# Supplementary material for: Effect of Saffron Extract and Crocin in Serum Metabolites of Induced Obesity Rats
Source: Hindawi journal article supplement (doi:10.1155/2020/1247946), 2020-01-01
Supplement: f1 [file 1247946.f1.pdf]

Supplementary Table S1: Composition of the diets fed to the animals [8]

| <b>Ingredients</b> | <b>Normal diet (g/kg diet)</b> | <b>High fat diet (g/kg diet)</b> |
|--------------------|--------------------------------|----------------------------------|
| Casein             | 200                            | 200                              |
| DL-methionine      | 3                              | 3                                |
| Corn starch        | 650                            | 150                              |
| Sucrose            | -                              | 150                              |
| Cellulose          | 50                             | 50                               |
| Corn oil           | 50                             | -                                |
| Beef tallow        | -                              | 400                              |
| Mineral mix        | 35                             | 35                               |
| Vitamin mix        | 10                             | 10                               |
| Choline bitartrate | 2                              | 2                                |

Supplementary Table S2: Effect of saffron extract and crocin on the changes of food consumption at initial and the end of 8-week treatment [8]

| <b>Group</b>  | <b>Week 0</b> | <b>Week 8</b> | <b>Change</b> | <b>p value</b> |
|---------------|---------------|---------------|---------------|----------------|
| <b>LN</b>     | 132.40 ± 1.20 | 132.33 ± 1.20 | -0.1          | 0.85           |
| <b>OB</b>     | 115.60 ± 3.80 | 120.00 ± 1.60 | 4.4           | 0.85           |
| <b>OBCR40</b> | 106.80 ± 3.20 | 104.70 ± 0.20 | -2.1          | 0.23           |
| <b>OBCR80</b> | 114.20 ± 2.30 | 103.60 ± 1.50 | -10.6         | 0.01**         |
| <b>OBSF40</b> | 111.30 ± 6.60 | 103.50 ± 2.40 | -7.8          | 0.12           |
| <b>OBSF80</b> | 114.50 ± 5.60 | 100.5 ± 0.50  | -14           | 0.01**         |

Values are expressed as the mean ± SE (standard error of mean) of six rats; \* p < 0.05, \*\* p < 0.01 (significance level)

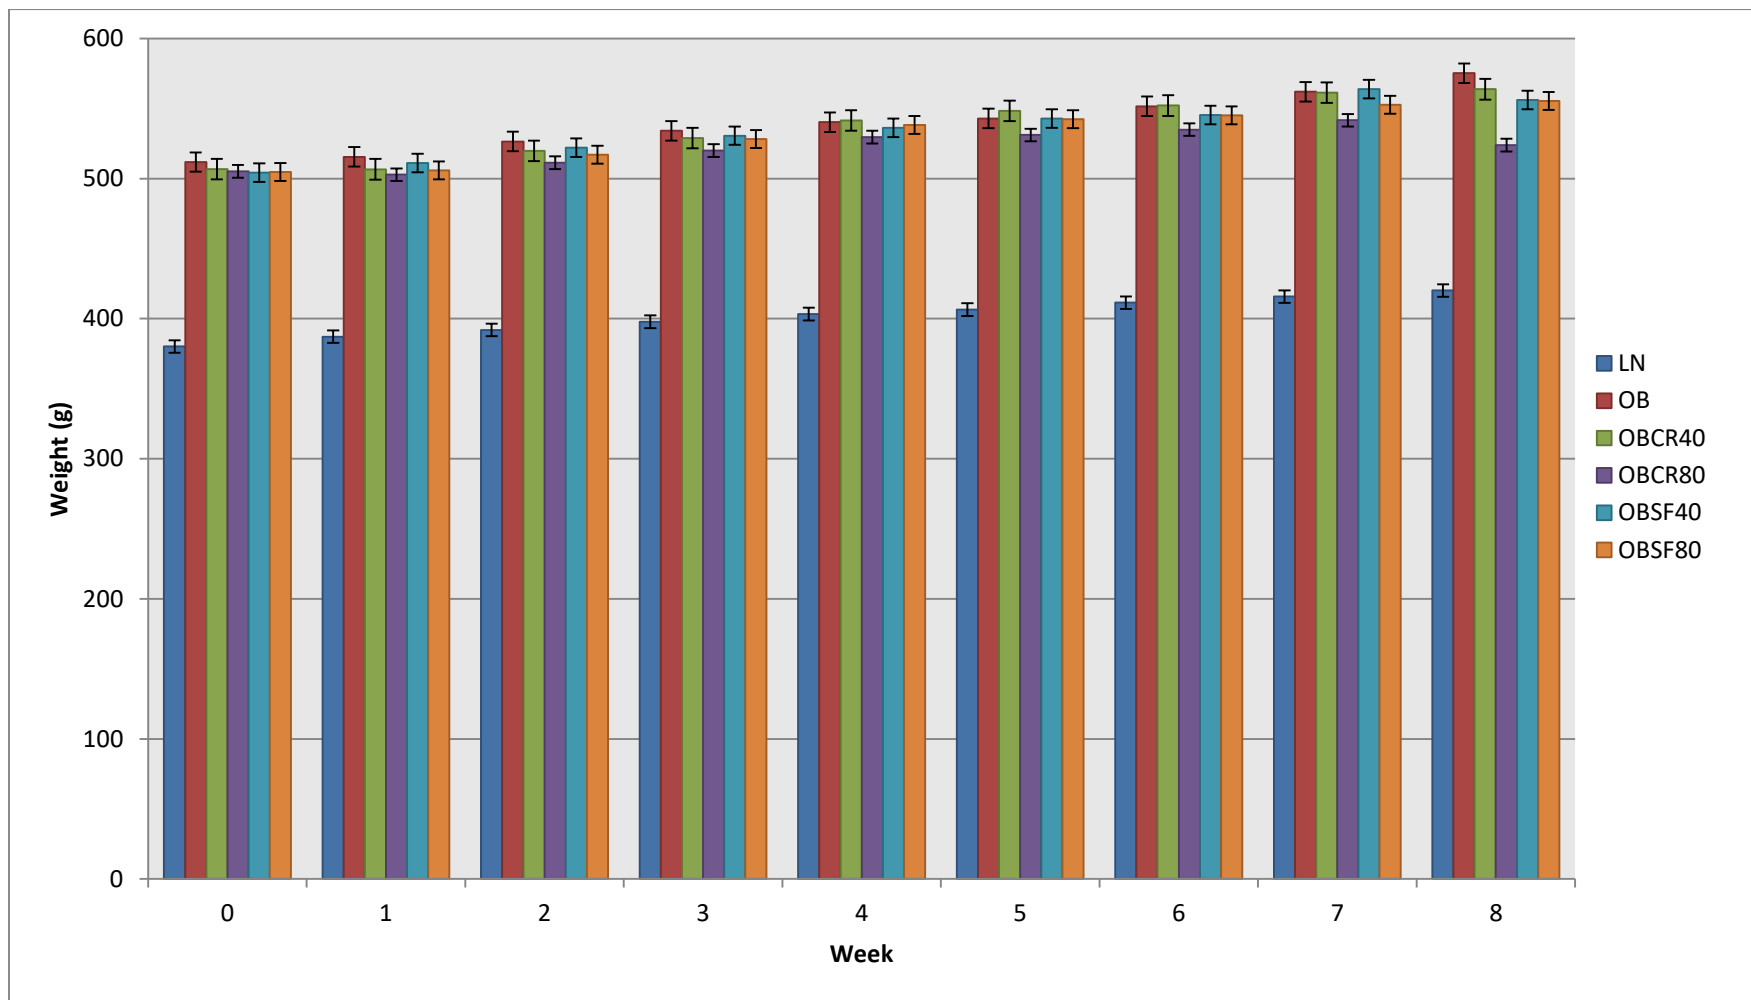

Supplementary Figure S1: Effect of saffron extract and crocin on body weight during 8 weeks of treatment [8]

Supplementary Table S3: Effect of saffron extract and crocin on biochemical parameters [8]

| <b>Biochemical Parameters</b> |             |             |             |             |               |
|-------------------------------|-------------|-------------|-------------|-------------|---------------|
|                               | TG (mM/L)   | TC (mM/L)   | LDL (mM/L)  | HDL (mM/L)  | FBG (mM/L)    |
| <b>LN</b>                     | 2.23 ± 0.29 | 1.13 ±0.24  | 0.21 ±0.03  | 0.58 ±0.15  | 5.42 ± 0.67   |
| <b>OB</b>                     | 2.64 ±0.15  | 1.44 ±0.13  | 0.28 ±0.12  | 0.41 ±0.05  | 6.91 ± 0.61   |
| <b>OBCR40</b>                 | 2.08 ±0.41  | 1.35 ±0.18  | 0.24 ± 0.07 | 0.52 ± 0.06 | 5.80 ± 0.14   |
| <b>OBCR80</b>                 | 1.86 ±0.29* | 1.07 ±0.08* | 0.24 ± 0.06 | 0.39 ± 0.08 | 5.66 ± 0.62*  |
| <b>OBSF40</b>                 | 2.49 ±0.38  | 1.32 ±0.27  | 0.20 ± 0.03 | 0.49 ± 0.11 | 6.10 ± 0.82   |
| <b>OBSF80</b>                 | 2.28 ±0.26  | 1.03 ±0.24* | 0.24 ± 0.08 | 0.33 ± 0.09 | 5.26 ± 0.38** |

Triglycerides (TG), Total cholesterol (TC), Low density lipoprotein (LDL), High density lipoprotein (HDL), Fasting blood glucose (FBG), Lean group (LN), Obese group (OB), Obese + Crocin 40 mg/kg group (OBCR40), Obese + Crocin 80 mg/kg group (OBCR80), Obese + Saffron extract 40 mg/kg group (OBSF40) Obese + Saffron extract 80 mg/kg group (OBSF80) Value are expressed as mean ± SE of six rats \* p < 0.05 vs negative control (OB), \*\* p < 0.01 vs negative control (OB)

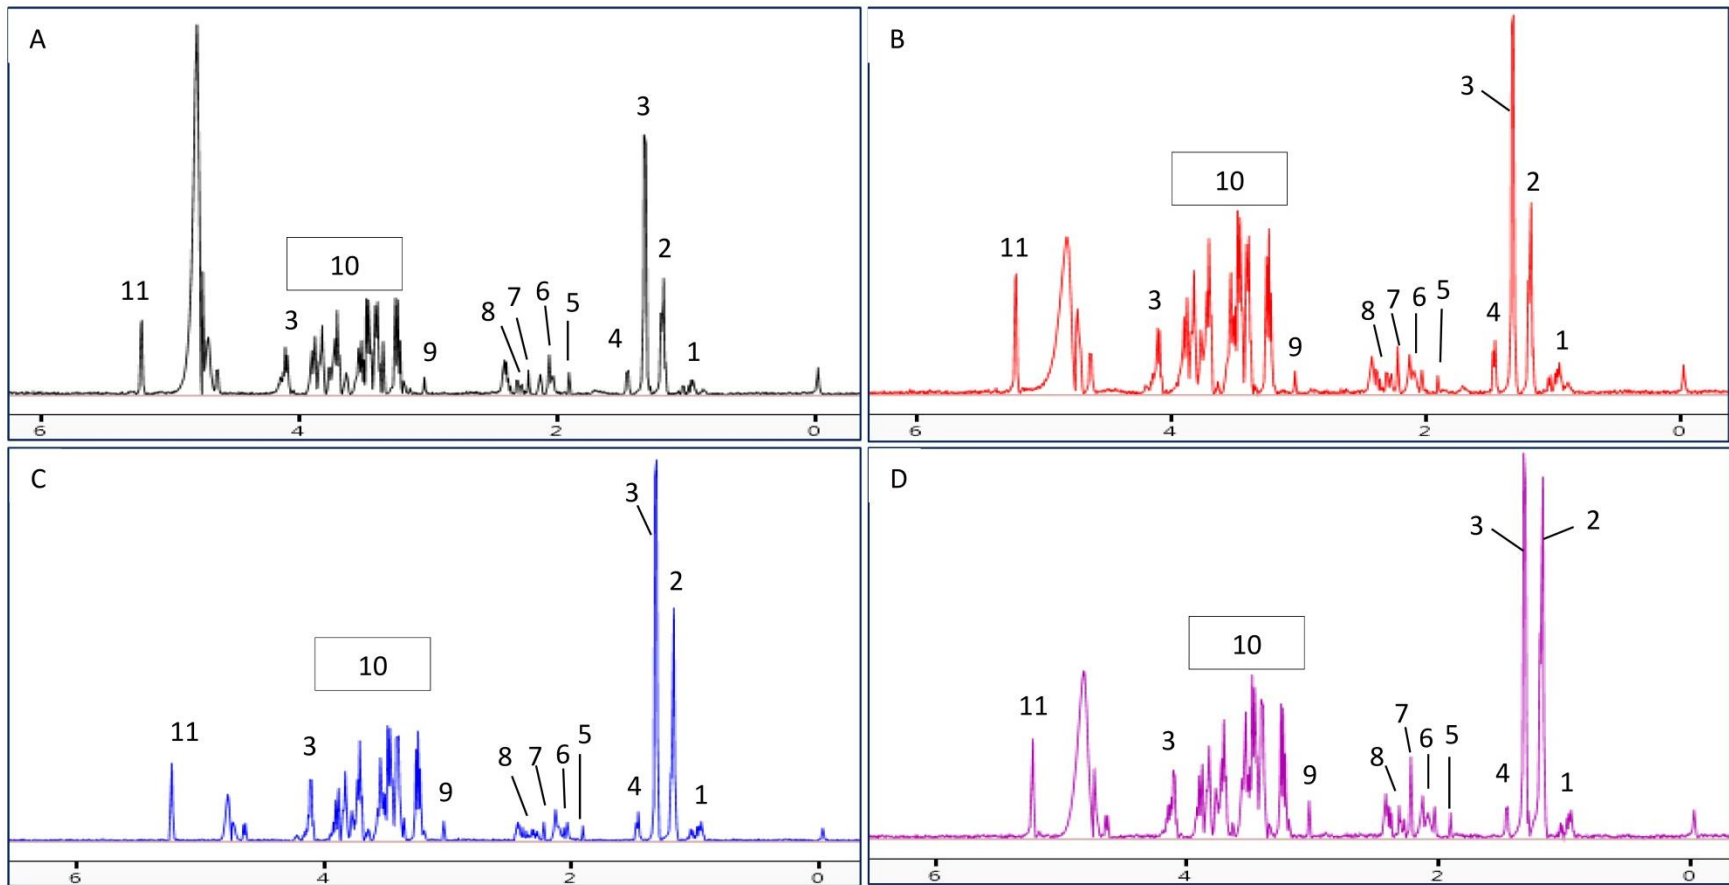

Supplementary Figure S2: Typical 500 MHz  $^1\text{H}$ -NMR CPMG spectra of serum collected from a Lean group (A), Obese group (B), Obese + Crocin 80mg/kg group (C) and Obese + Saffron extract 80mg/kg group (D). 1. Valine 2. 3-hydroxybutyrate 3. Lactate 4. Alanine 5. Acetate 6. N-acetylglycoprotein 7. Methionine 8. Pyruvate 9. Creatinine 10. Glucose, 11.  $\alpha$ -Glucose

Supplementary Table S4: <sup>1</sup>H-NMR assignments of metabolites in rat serum

| <b>Metabolites</b>           | <b>Chemical shifts (ppm)</b> |
|------------------------------|------------------------------|
| Lactate                      | 1.34 (d)                     |
|                              | 4.11 (q)                     |
| 3-Hydroxybutyrate            | 1.18 (d)                     |
|                              | 2.31 (d)                     |
|                              | 2.42 (dd)                    |
|                              | 4.14 (m)                     |
| Creatinine                   | 3.06 (s)                     |
|                              | 4.06 (s)                     |
| Alanine                      | 1.48 (d)                     |
|                              | 3.78 (q)                     |
| Acetate                      | 1.93 (s)                     |
| Methionine                   | 2.16 (m)                     |
|                              | 2.64 (t)                     |
|                              | 2.13 (s)                     |
| <i>N</i> -acetylglycoprotein | 2.03 (s)                     |
| Pyruvate                     | 2.38 (s)                     |
| $\alpha$ D-Glucose           | 5.22 (d)                     |
| Valine                       | 0.98 (d)                     |
|                              | 1.04 (d)                     |

s: single; d: doublet; dd: doublet of doublets; t: triplet; m: multiplet

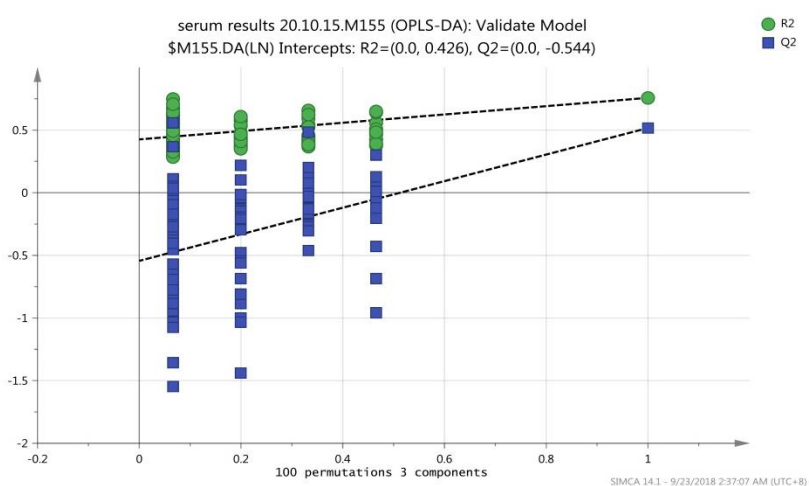

Supplementary Figure S3: Permutation Test (100 cycle) for PLS-DA model in lean rats (LN) after the 22<sup>nd</sup> week.

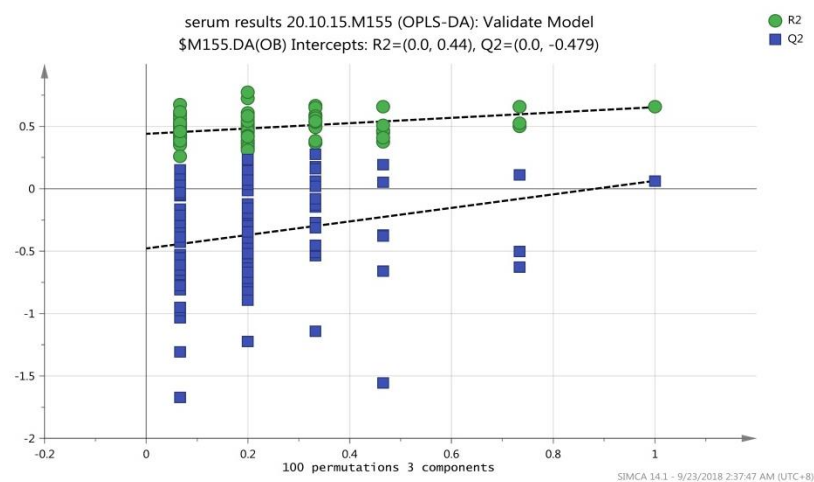

Supplementary Figure S4: Permutation Test (100 cycle) for PLS-DA model in obese rats (OB) after the 22<sup>nd</sup> week.

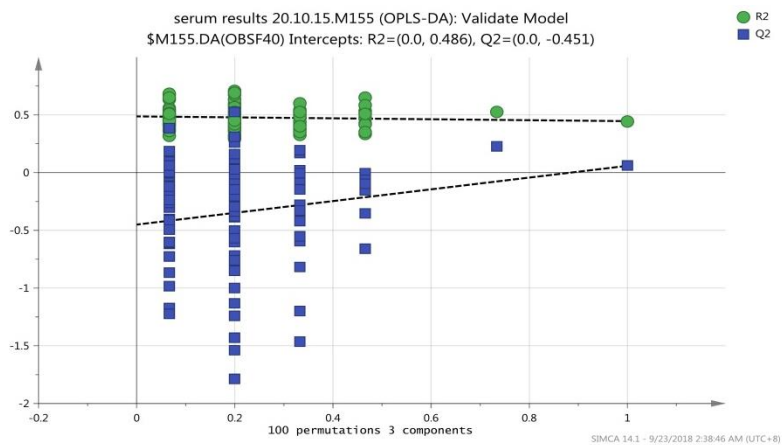

Supplementary Figure S5: Permutation Test (100 cycle) for PLS-DA model in obese rats treated with saffron extract (40 mg/kg) (OBSF40) after the 22<sup>nd</sup> week.

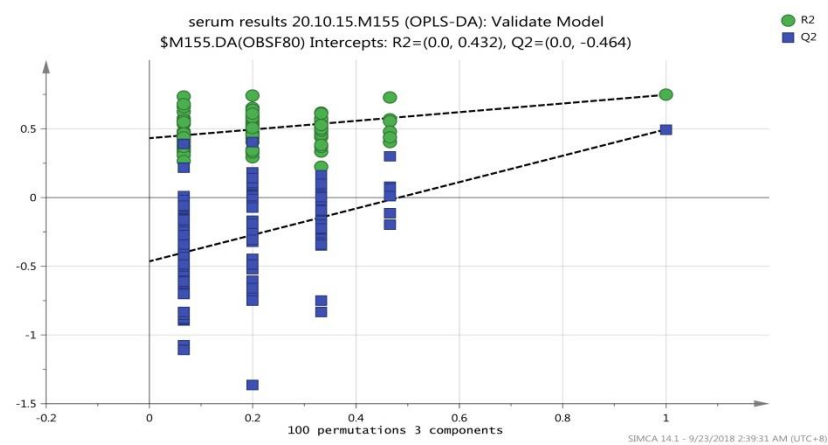

Supplementary Figure S6: Permutation Test (100 cycle) for PLS-DA model in obese rats treated with saffron extract (80 mg/kg) (OBSF80) after the 22<sup>nd</sup> week.

Supplementary Table S5: Misclassification table for PLS-DA model discriminating the lean group (LN), obese group (OB), obese rats treated with saffron extract (40 mg/kg) (OBSF40) and obese rats treated with saffron extract (80 mg/kg) (OBSF80) after the 22<sup>nd</sup> week.

|                       | Members  | Correct | LN | OB | OBSF40 | OBSF80 | No class<br>(YPred ≤ 0) |
|-----------------------|----------|---------|----|----|--------|--------|-------------------------|
| LN                    | 5        | 100%    | 5  | 0  | 0      | 0      | 0                       |
| OB                    | 5        | 100%    | 0  | 5  | 0      | 0      | 0                       |
| OBSF40                | 5        | 60%     | 0  | 1  | 3      | 1      | 0                       |
| OBSF80                | 5        | 100%    | 0  | 0  | 0      | 5      | 0                       |
| No class              | 22       |         | 12 | 5  | 4      | 1      | 0                       |
| <b>Total</b>          | 42       | 90%     | 17 | 11 | 7      | 7      | 0                       |
| <b>Fisher's prob.</b> | 7.4e-008 |         |    |    |        |        |                         |



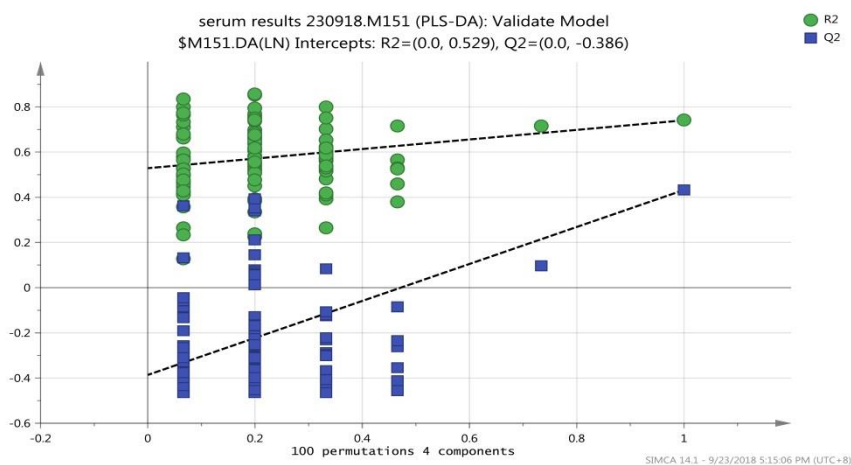

Supplementary Figure S7: Permutation Test (100 cycle) for PLS-DA model in lean rats (LN) after the 22<sup>nd</sup> week.

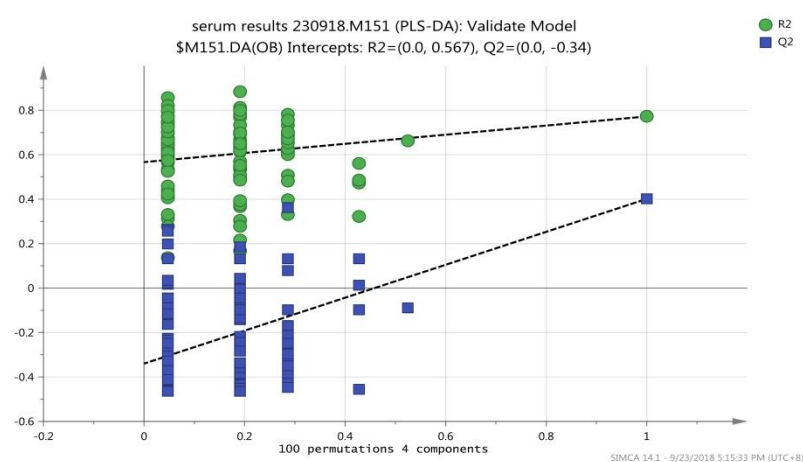

Supplementary Figure S8: Permutation Test (100 cycle) for PLS-DA model in obese rats (OB) after the 22<sup>nd</sup> week.

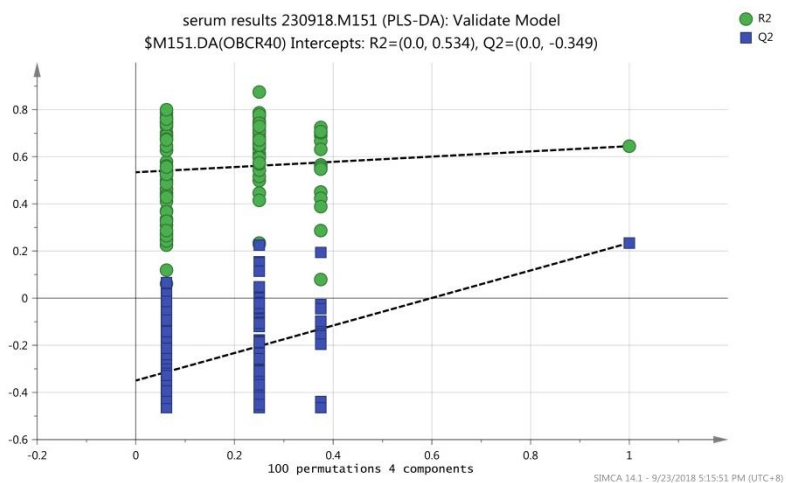

Supplementary Figure S9: Permutation Test (100 cycle) for PLS-DA model in obese rats treated with crocin (40 mg/kg) (OBCR40) after the 22<sup>nd</sup> week.

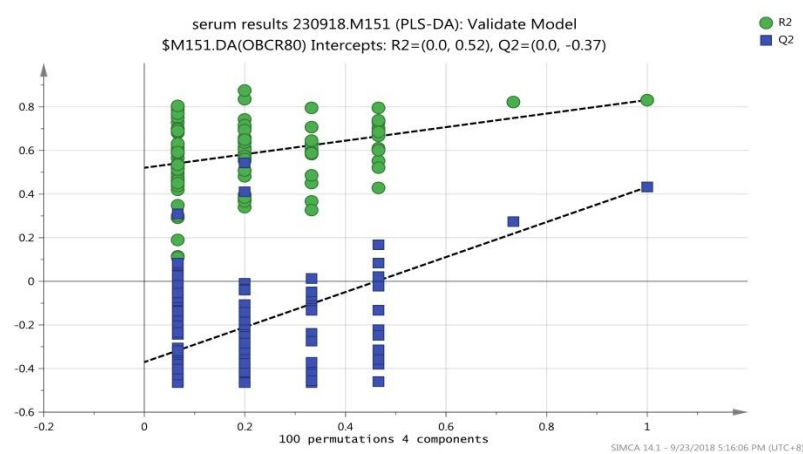

Supplementary Figure S10: Permutation Test (100 cycle) for PLS-DA model in obese rats treated with crocin (80 mg/kg) (OBCR80) after the 22<sup>nd</sup> week.

Supplementary Table S6: Misclassification table for PLS-DA model discriminating the lean group (LN), obese group (OB), obese rats treated with crocin (40 mg/kg) (OBCR40) and obese rats treated with crocin (80 mg/kg) (OBCR80) after the 22<sup>nd</sup> week.

|                       | Members  | Correct | LN | OB | OBCR40 | OBCR80 | No class<br>(YPred <= 0) |
|-----------------------|----------|---------|----|----|--------|--------|--------------------------|
| LN                    | 5        | 80%     | 4  | 1  | 0      | 0      | 0                        |
| OB                    | 6        | 100%    | 0  | 6  | 0      | 0      | 0                        |
| OBCR40                | 4        | 100%    | 0  | 0  | 4      | 0      | 0                        |
| OBCR80                | 5        | 100%    | 0  | 0  | 0      | 5      | 0                        |
| No class              | 22       |         | 5  | 12 | 2      | 3      | 0                        |
| <b>Total</b>          | 42       | 95%     | 9  | 19 | 6      | 8      | 0                        |
| <b>Fisher's prob.</b> | 2.9e-009 |         |    |    |        |        |                          |

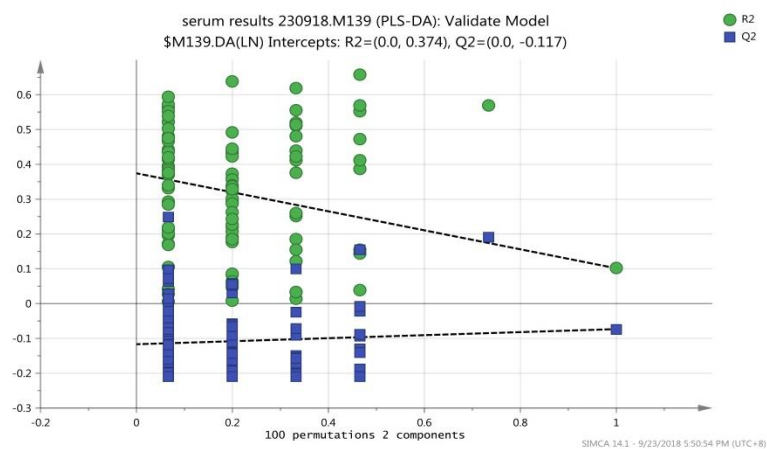

Supplementary Figure S11: Permutation Test (100 cycle) for PLS-DA model in lean rats (LN) after the 22<sup>nd</sup> week.

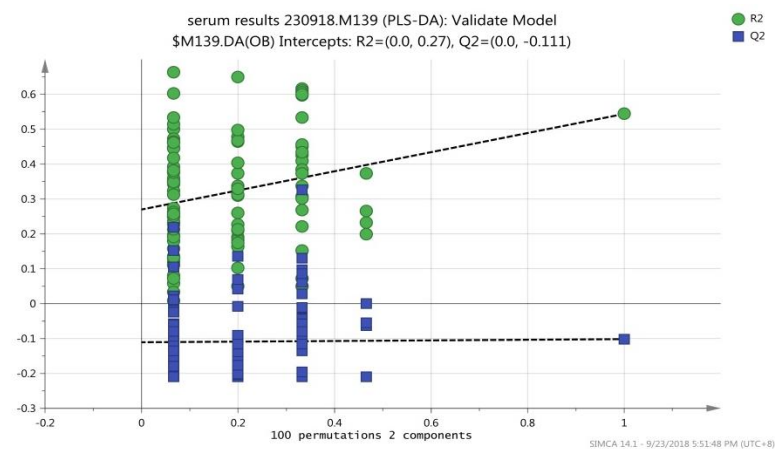

Supplementary Figure S12: Permutation Test (100 cycle) for PLS-DA model in obese rats (OB) after the 22<sup>nd</sup> week.

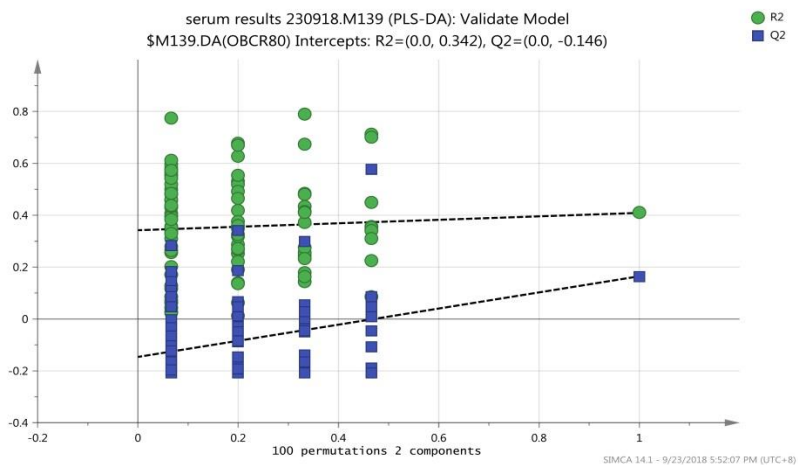

Supplementary Figure S13: Permutation Test (100 cycle) for PLS-DA model in obese rats treated with crocin (80 mg/kg) (OBCR80) after the 22<sup>nd</sup> week.

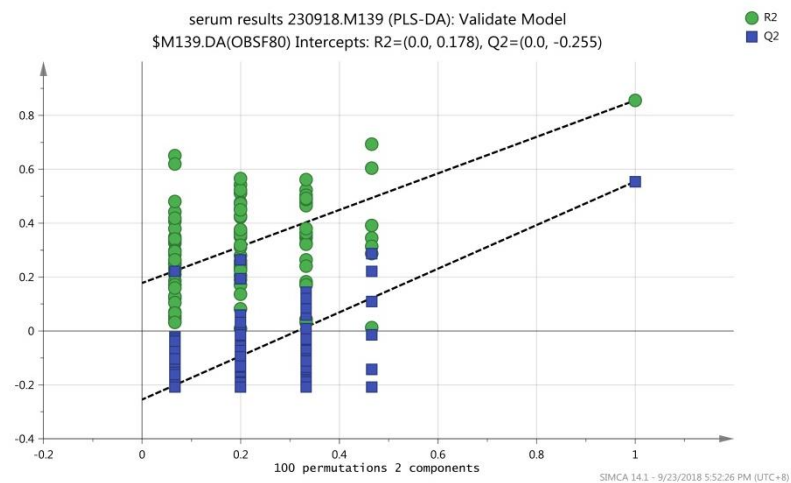

Supplementary Figure S14: Permutation Test (100 cycle) for PLS-DA model in obese rats treated with saffron extract (80 mg/kg) (OBSF80) after the 22<sup>nd</sup> week

Supplementary Table S7: Misclassification table for PLS-DA model discriminating the lean group (LN), obese group (OB), obese rats treated with saffron extract (80 mg/kg) (OBSF80) and obese rats treated with crocin (80 mg/kg) (OBCR80) after the 22<sup>nd</sup> week.

|                           | Members  | Correct | LN | OB | OBCR80 | OBSF80 | No class<br>(YPred ≤ 0) |
|---------------------------|----------|---------|----|----|--------|--------|-------------------------|
| LN                        | 5        | 0%      | 0  | 1  | 3      | 1      | 0                       |
| OB                        | 5        | 100%    | 0  | 5  | 0      | 0      | 0                       |
| OBCR80                    | 5        | 80%     | 0  | 1  | 4      | 0      | 0                       |
| OBSF80                    | 5        | 100%    | 0  | 0  | 0      | 5      | 0                       |
| No class                  | 22       |         | 0  | 10 | 8      | 4      | 0                       |
| <b>Total</b>              | 42       | 70%     | 0  | 17 | 15     | 10     | 0                       |
| <b>Fisher's<br/>prob.</b> | 7.8e-005 |         |    |    |        |        |                         |
